# Supplementary material
Source: MDPI journal article supplement (https://www.mdpi.com/2073-4344/8/5/207)

# Supporting information: Fe Oxides Loaded on Carbon Cloth by Hydrothermal Process as an Effective and Reusable Heterogenous Fenton Catalyst

Honghui Yang \*, Bofang Shi and Silan Wang

Department of Environmental Science and Engineering, Xi'an Jiaotong University, Xi'an 710049, China; shi1003324005@stu.xjtu.edu.cn (B.S.); wsl3116019006@stu.xjtu.edu.cn (S.W.)

\* Correspondence: yanghonghui@mail.xjtu.edu.cn

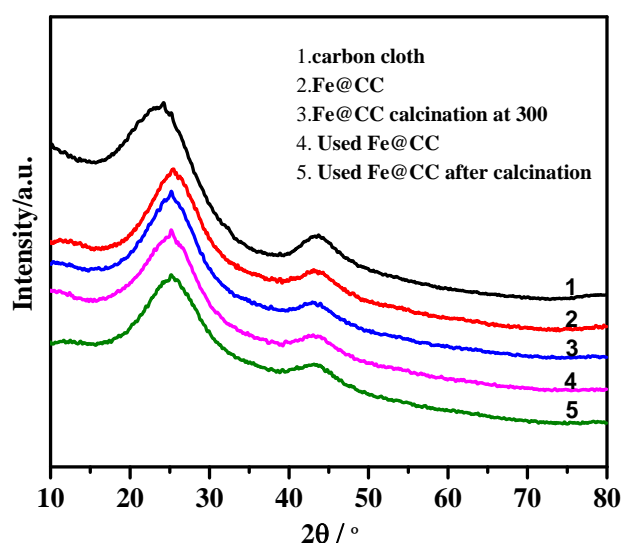

**Figure S1.** XRD patterns of carbon cloth and Fe@CC. 1. Carbon cloth without treatment; 2. Fresh Fe@CC prepared by hydrothermal reaction; 3. Fe@CC calcinated at 300°C for 1 h; 4. Fe@CC after used for 4 tests; 5. Fe@CC used for 4 tests and then calcinated at 300°C for 1 h.

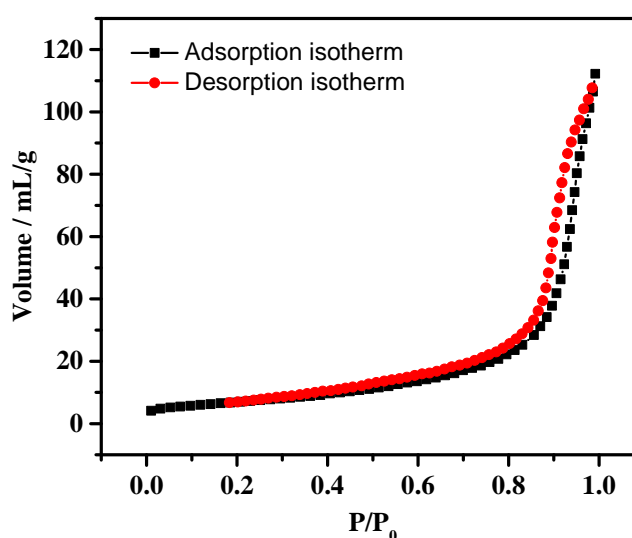

**Figure S2.** Isothermal adsorption and desorption curves of Fe oxide prepared by hydrothermal reaction.

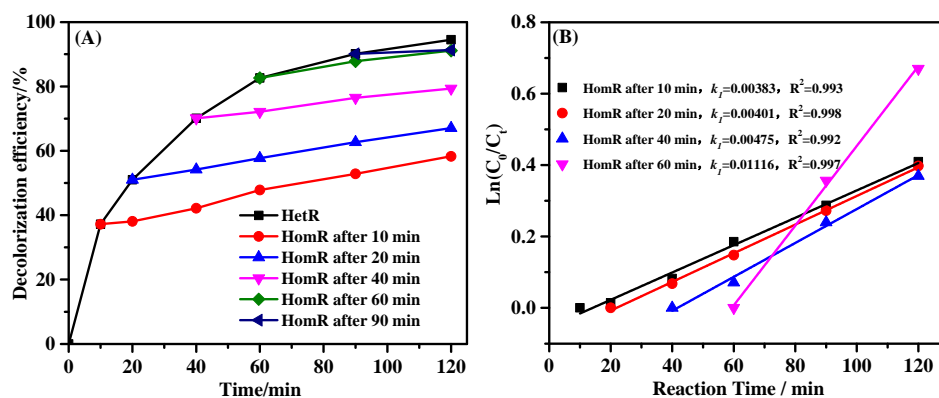

**Figure S3.** (A) Significance of homogeneous reaction, and (B) the rate constants of homogeneous reaction fitted from the data in (A). HetR: fenton reaction with Fe@CC; HomR: homogenous reaction with the leached iron ions.

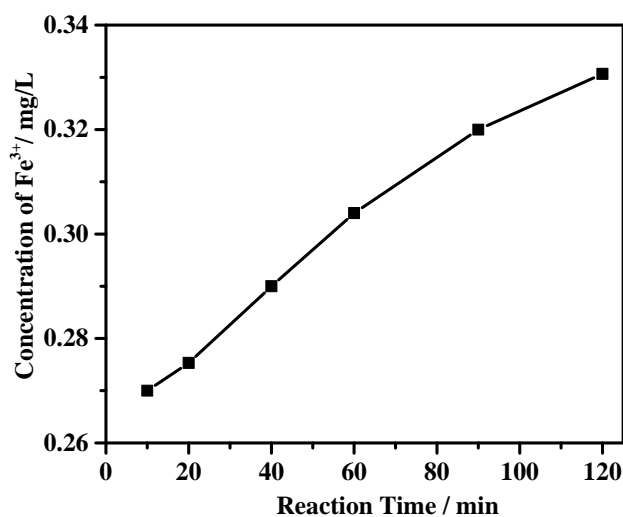

**Figure S4.** The concentration of iron ions leached in the solution versus reaction time with Fe@CC.

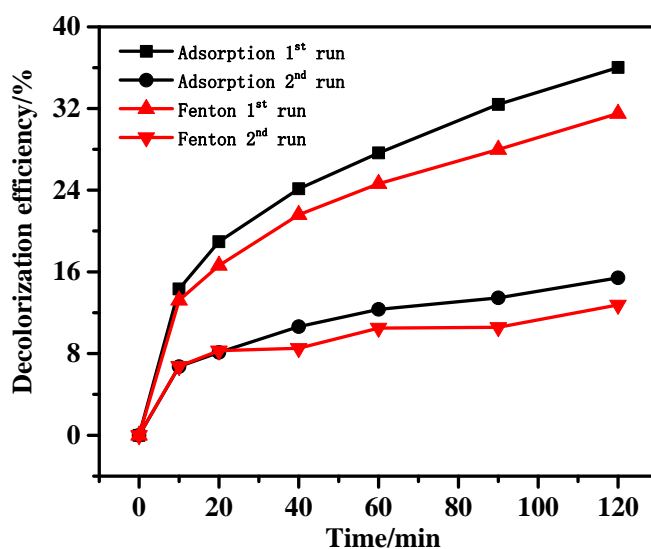

**Figure S5.** Fenton like reaction with carbon cloth as the catalyst.

© 2017 by the authors. Submitted for possible open access publication under the terms and conditions of the Creative Commons Attribution (CC BY) license (<http://creativecommons.org/licenses/by/4.0/>).

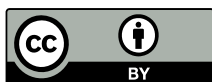

Supplement: s1 [file s1]
